# Supplementary material
Source: PubMed Central journal article supplement (PMC2772691)
Supplement: supp_83_22_11914__1.pdf [file supp_83_22_11914__1.pdf]

TABLE S1A. Strains with deletions of FG repeats

| Strain  | MAT      | Description                                                                                     | Genotype                                                                                                                                    | Source              |
|---------|----------|-------------------------------------------------------------------------------------------------|---------------------------------------------------------------------------------------------------------------------------------------------|---------------------|
| SWY2283 | a        | wt                                                                                              | <i>trp1-1 leu2-3,112u ra3-1 his3-11,15*</i>                                                                                                 | Strawn et al., 2004 |
| SWY2284 | $\alpha$ | wt                                                                                              | <i>leu2-3,112 ura3-1 his3-11,15 lys2*</i>                                                                                                   | "                   |
| SWY2801 | $\alpha$ | <i>nup1</i> $\Delta$ FxFG                                                                       | <i>trp1 leu2 ura3 his3 T7-LoxP-nup1</i> $\Delta$ FxFG                                                                                       | "                   |
| SWY2731 | a        | <i>nup2</i> $\Delta$ FxFG                                                                       | <i>trp1 leu2 ura3 his3 myc-LoxP-nup2</i> $\Delta$ FxFG                                                                                      | "                   |
| SWY2772 | a        | <i>nup60</i> $\Delta$ FxF                                                                       | <i>trp1 leu2 ura3 his3 myc-LoxP-nup60</i> $\Delta$ FxF                                                                                      | "                   |
| SWY2922 | a        | <i>nsp1</i> $\Delta$ FG $\Delta$ FxFG                                                           | <i>trp1 leu2 ura3 his3 flag-LoxP-nsp1</i> $\Delta$ FG $\Delta$ FxFG                                                                         | "                   |
| SWY2825 | a        | <i>nup49</i> $\Delta$ GLFG                                                                      | <i>trp1 leu2 ura3 his3 T7-LoxP-nup49</i> $\Delta$ GLFG                                                                                      | "                   |
| SWY2869 | a        | <i>nup145</i> $\Delta$ GLFG                                                                     | <i>trp1 leu2 ura3 his3 myc-LoxP-nup145</i> $\Delta$ GLFG                                                                                    | "                   |
| SWY2754 | a        | <i>nup57</i> $\Delta$ GLFG                                                                      | <i>trp1 leu2 ura3 his3 myc-LoxP-nup57</i> $\Delta$ GLFG                                                                                     | "                   |
| SWY2764 | a        | <i>nup100</i> $\Delta$ GLFG                                                                     | <i>trp1 leu2 ura3 his3 ha-LoxP-nup100</i> $\Delta$ GLFG                                                                                     | "                   |
| SWY2789 | a        | <i>nup116</i> $\Delta$ GLFG                                                                     | <i>trp1 leu2 ura3 his3 T7-LoxP-nup116</i> $\Delta$ GLFG                                                                                     | "                   |
| SWY2882 | a        | <i>nup57</i> $\Delta$ GLFG <i>nup49</i> $\Delta$ GLFG                                           | <i>leu2 ura3 his3 T7-LoxP-nup49</i> $\Delta$ GLFG <i>myc-LoxP-nup57</i> $\Delta$ GLFG                                                       | "                   |
| SWY2916 | a        | <i>nup116</i> $\Delta$ GLFG <i>nup145</i> $\Delta$ GLFG                                         | <i>trp1 leu2 ura3 his3 T7-LoxP-nup116</i> $\Delta$ GLFG <i>myc-LoxP-nup145</i> $\Delta$ GLFG                                                | "                   |
| SWY2819 | a        | <i>nup116</i> $\Delta$ GLFG <i>nup57</i> $\Delta$ GLFG                                          | <i>trp1 leu2 ura3 his3 T7-LoxP-nup116</i> $\Delta$ GLFG <i>myc-LoxP-nup57</i> $\Delta$ GLFG                                                 | "                   |
| SWY2841 | a        | <i>nup116</i> $\Delta$ GLFG <i>nup49</i> $\Delta$ GLFG                                          | <i>trp1 leu2 ura3 his3 T7-LoxP-nup116</i> $\Delta$ GLFG <i>T7-LoxP-nup49</i> $\Delta$ GLFG                                                  | "                   |
| SWY2973 | a        | <i>nup100</i> $\Delta$ GLFG <i>nup145</i> $\Delta$ GLFG                                         | <i>leu2 ura3 his3 ha-LoxP-nup100</i> $\Delta$ GLFG <i>myc-LoxP-nup145</i> $\Delta$ GLFG                                                     | "                   |
| SWY2785 | a        | <i>nup100</i> $\Delta$ GLFG <i>nup57</i> $\Delta$ GLFG                                          | <i>trp1 leu2 ura3 his3 ha-LoxP-nup100</i> $\Delta$ GLFG <i>myc-LoxP-nup57</i> $\Delta$ GLFG                                                 | "                   |
| SWY2835 | a        | <i>nup100</i> $\Delta$ GLFG <i>nup49</i> $\Delta$ GLFG                                          | <i>trp1 leu2 ura3 his3 ha-LoxP-nup100</i> $\Delta$ GLFG <i>T7-LoxP-nup49</i> $\Delta$ GLFG                                                  | "                   |
| SWY2924 | a        | <i>nup145</i> $\Delta$ GLFG <i>nup57</i> $\Delta$ GLFG                                          | <i>trp1 leu2 ura3 his3 myc-LoxP-nup145</i> $\Delta$ GLFG <i>myc-LoxP-nup57</i> $\Delta$ GLFG                                                | "                   |
| SWY2965 | a        | <i>nup145</i> $\Delta$ GLFG <i>nup49</i> $\Delta$ GLFG                                          | <i>leu2 ura3 his3 myc-LoxP-nup145</i> $\Delta$ GLFG <i>T7-LoxP-nup49</i> $\Delta$ GLFG                                                      | "                   |
| SWY2871 | a        | <i>nup100</i> $\Delta$ GLFG <i>nup49</i> $\Delta$ GLFG                                          | <i>trp1 leu2 ura3 his3 ha-LoxP-nup100</i> $\Delta$ GLFG <i>T7-LoxP-nup49</i> $\Delta$ GLFG <i>myc-LoxP-nup57</i> $\Delta$ GLFG              | "                   |
| SWY2968 | a        | <i>nup100</i> $\Delta$ GLFG <i>nup145</i> $\Delta$ GLFG<br><i>nup49</i> $\Delta$ GLFG           | <i>trp1 leu2 ura3 his3 ha-LoxP-nup100</i> $\Delta$ GLFG <i>myc-LoxP-nup145</i> $\Delta$ GLFG <i>T7-LoxP-nup49</i> $\Delta$ GLFG             | "                   |
| SWY2951 | a        | <i>nup100</i> $\Delta$ GLFG <i>nup145</i> $\Delta$ GLFG<br><i>nup57</i> $\Delta$ GLFG           | <i>trp1 leu2 ura3 his3 ha-LoxP-nup100</i> $\Delta$ GLFG <i>myc-LoxP-nup145</i> $\Delta$ GLFG <i>T7-LoxP-nup57</i> $\Delta$ GLFG             | "                   |
| SWY2953 | $\alpha$ | <i>nup100</i> $\Delta$ GLFG <i>nup145</i> $\Delta$ GLFG<br><i>nup57</i> $\Delta$ GLFG           | <i>trp1-1 leu2 ura3 his3 ha-LoxP-nup100</i> $\Delta$ GLFG <i>myc-LoxP-nup145</i> $\Delta$ GLFG <i>myc-LoxP-nup57</i> $\Delta$ GLFG          | "                   |
| SWY3008 | a        | <i>nup100</i> $\Delta$ GLFG <i>nup49</i> $\Delta$ GLFG<br><i>nsp1</i> $\Delta$ FG $\Delta$ FxFG | <i>leu2 ura3 his3 ha-LoxP-nup100</i> $\Delta$ GLFG <i>T7-LoxP-nup49</i> $\Delta$ GLFG <i>flag-LoxP-nsp1</i> $\Delta$ FG $\Delta$ FxFG       | "                   |
| SWY3012 | a        | <i>nup100</i> $\Delta$ GLFG <i>nup57</i> $\Delta$ GLFG<br><i>nsp1</i> $\Delta$ FG $\Delta$ FxFG | <i>trp1 leu2 ura3 his3 ha-LoxP-nup100</i> $\Delta$ GLFG <i>myc-LoxP-nup57</i> $\Delta$ GLFG <i>flag-LoxP-nsp1</i> $\Delta$ FG $\Delta$ FxFG | "                   |

|         |   |                                                 |                                                                                                                                                                    |                     |
|---------|---|-------------------------------------------------|--------------------------------------------------------------------------------------------------------------------------------------------------------------------|---------------------|
| SWY2980 | a | <i>nup100 ΔGLFG nup145 ΔGLFG nsp1 ΔFG ΔFxFG</i> | <i>trp1 leu2 ura3 his3 ha-LoxP-nup100 ΔGLFG myc-LoxP-nup145 ΔGLFG flag-LoxP-nsp1 ΔFG ΔFxFG</i>                                                                     | "                   |
| SWY2844 | a | <i>ΔC</i>                                       | <i>trp1 ura3 leu2 his3 ha-LoxP-Nup42 ΔFG myc-LoxP-Nup159 ΔFG</i>                                                                                                   | "                   |
| SWY2852 | α | <i>ΔC nsp1 ΔFG</i>                              | <i>trp1 ura3 leu2 his3 ha-LoxP-Nup42 ΔFG flag-LoxP-Nsp1 ΔFG myc-LoxP-Nup159 ΔFG</i>                                                                                | "                   |
| SWY2897 | α | <i>ΔN</i>                                       | <i>trp1 ura3 leu2 his3 myc-LoxP-Nup2 ΔFxFG T7-LoxP-Nup1 ΔFxFG myc-LoxP-Nup60 ΔFxF</i>                                                                              | "                   |
| SWY2905 | α | <i>ΔN nsp1 ΔFxFG</i>                            | <i>trp1 ura3 leu2 his3 T7-LoxP-Nup1 ΔFxFG myc-LoxP-Nup2 ΔFxFG HA-LoxP-Nsp1 ΔFxFG myc-LoxP-Nup60 ΔFxF</i>                                                           | "                   |
| SWY3062 | a | <i>ΔNΔC nsp1 ΔFG ΔFxFG</i>                      | <i>trp1 leu2 ura3 his3 ha-LoxP-nup42 ΔFG myc-LoxP-nup159 ΔFG T7-LoxP-nup1 ΔFxFG myc-LoxP-nup2 ΔFxFLG myc-LoxP-nup60 ΔFxF flag-LoxP-nsp1 ΔFG ΔFxFG</i>              | "                   |
| SWY3063 | α | <i>ΔNΔC nsp1 ΔFG ΔFxFG</i>                      | <i>trp1 ura3-1 leu2-3,112 his3-11,15 HA-LoxP-nup42 ΔFG myc-LoxP-nup159 ΔFG T7-LoxP-nup1 ΔFxFG myc-LoxP-nup2 ΔFxFG myc-LoxP-nup60 ΔFxF flag-LoxP-nsp1 ΔFG ΔFxFG</i> | "                   |
| SWY2971 | α | <i>ΔNΔC</i>                                     | <i>trp1 ura3 leu2 his3 ha-LoxP-Nup42 ΔFG myc-LoxP-Nup159 ΔFG T7-LoxP-Nup1 ΔFxFG myc-LoxP-Nup2 ΔFxFG myc-LoxP-Nup60 ΔFxF</i>                                        | "                   |
| SWY3462 | a | <i>ΔNΔC nup145 ΔGLFG</i>                        | <i>trp1 lys2 leu2 ura3 his3 ha-LoxP-nup42 ΔFG myc-LoxP-nup159 ΔFG T7-LoxP-nup1 ΔFxFG myc-LoxP-nup2 ΔFxFG myc-LoxP-nup60 ΔFxF myc-LoxP-nup145 ΔGLFG</i>             | Terry & Went, 2007  |
| SWY3410 | α | <i>ΔNΔC nup57 ΔGLFG</i>                         | <i>trp1 leu2 ura3 his3 ha-LoxP-nup42 ΔFG myc-LoxP-nup159 ΔFG T7-LoxP-nup1 ΔFxFG myc-LoxP-nup2 ΔFxFG myc-LoxP-nup60 ΔFxF myc-LoxP-nup57 ΔGLFG</i>                   | "                   |
| SWY3930 | a | <i>ΔNΔC nup57 ΔGLFG</i>                         | <i>trp1 leu2 ura3 his3 T7-LoxP-nup1 ΔFxFG myc-LoxP-nup2 ΔFxFLG myc-LoxP-nup60 ΔFxF ha-LoxP-nup42 ΔFG myc-LoxP-nup159 ΔFG myc-LoxP-nup57 ΔGLFG</i>                  | "                   |
| SWY3043 | a | <i>ΔNΔC nup100 ΔGLFG</i>                        | <i>trp1 ura3 leu2 his3 ha-LoxP-nup42 ΔFG myc-LoxP-nup159 ΔFG T7-LoxP-nup1 ΔFxFG myc-LoxP-nup2 ΔFxFG myc-LoxP-nup60 ΔFxF HA-loxP-nup100 ΔGLFG</i>                   | Strawn et al., 2004 |
| SWY3603 | α | <i>ΔNΔC nup116 ΔGLFG</i>                        | <i>trp1 ura3 leu2 his3 ha-LoxP-nup42 ΔFG myc-LoxP-nup159 ΔFG T7-LoxP-nup1 ΔFxFG myc-LoxP-nup2 ΔFxFG myc-LoxP-nup60 ΔFxF T7-LoxP-nup116 ΔGLFG</i>                   | Terry & Went, 2007  |

\*These are also full genotypes for all the mutant strains for which these are parental, for mutants abbreviated as *trp1 ura3 leu2 his3*

TABLE S1B. Common and deletion strains

| Strain*         | MAT | Description          | Genotype                                                                                        | Source                        |
|-----------------|-----|----------------------|-------------------------------------------------------------------------------------------------|-------------------------------|
| yTM443          | a   | wt                   | <i>trp1-H3 ura3-52 his3-200 ade2-101 lys2-1 leu1-12 can1-100 bar1::hisG</i><br><i>GAL+ ΔTy3</i> | Menees and Sandmeyer,<br>1994 |
| BY4741          | a   | wt                   | <i>his3Δ1 leu2Δ0 met15Δ0 ura3Δ0</i>                                                             | Open Biosystems               |
| <i>nup120 Δ</i> | a   | <i>nup120 Δ</i>      | <i>nup120 Δ::kanMX4 his3Δ1 leu2Δ0 met15Δ0 ura3Δ0</i>                                            | "                             |
| <i>kap108 Δ</i> | a   | <i>kap108 Δ</i>      | <i>kap108 Δ::kanMX4 his3Δ1 leu2Δ0 met15Δ0 ura3Δ0</i>                                            | "                             |
| <i>kap114 Δ</i> | a   | <i>kap114 Δ</i>      | <i>kap114 Δ::kanMX4 his3Δ1 leu2Δ0 met15Δ0 ura3Δ0</i>                                            | "                             |
| <i>kap120 Δ</i> | a   | <i>kap120 Δ</i>      | <i>kap120 Δ::kanMX4 his3Δ1 leu2Δ0 met15Δ0 ura3Δ0</i>                                            | "                             |
| <i>kap122 Δ</i> | a   | <i>kap122 Δ</i>      | <i>kap122 Δ::kanMX4 his3Δ1 leu2Δ0 met15Δ0 ura3Δ0</i>                                            | "                             |
| <i>kap123 Δ</i> | a   | <i>kap123 Δ</i>      | <i>kap123 Δ::kanMX4 his3Δ1 leu2Δ0 met15Δ0 ura3Δ0</i>                                            | "                             |
| <i>kap142</i>   |     |                      |                                                                                                 |                               |
| <i>/msn5 Δ</i>  | a   | <i>kap142/msn5 Δ</i> | <i>kap142/msn5 Δ::kanMX4 his3Δ1 leu2Δ0 met15Δ0 ura3Δ0</i>                                       | "                             |
| <i>los1 Δ</i>   | a   | <i>los1 Δ</i>        | <i>los1 Δ::kanMX4 his3Δ1 leu2Δ0 met15Δ0 ura3Δ0</i>                                              | "                             |

\* All deletion strains were made in BY4741 background

TABLE S1B. Common and deletion strains

| Strain*         | MAT | Description            | Genotype                                                                                        | Source                        |
|-----------------|-----|------------------------|-------------------------------------------------------------------------------------------------|-------------------------------|
| yTM443          | a   | wt                     | <i>trp1-H3 ura3-52 his3-200 ade2-101 lys2-1 leu1-12 can1-100 bar1::hisG</i><br><i>GAL+ ΔTy3</i> | Menees and Sandmeyer,<br>1994 |
| BY4741          | a   | wt                     | <i>his3Δ1 leu2Δ0 met15Δ0 ura3Δ0</i>                                                             | Open Biosystems               |
| <i>nup120 Δ</i> | a   | <i>nup120 Δ</i>        | <i>nup120 Δ::kanMX4 his3Δ1 leu2Δ0 met15Δ0 ura3Δ0</i>                                            | "                             |
| <i>kap108 Δ</i> | a   | <i>kap108 Δ</i>        | <i>kap108 Δ::kanMX4 his3Δ1 leu2Δ0 met15Δ0 ura3Δ0</i>                                            | "                             |
| <i>kap114 Δ</i> | a   | <i>kap114 Δ</i>        | <i>kap114 Δ::kanMX4 his3Δ1 leu2Δ0 met15Δ0 ura3Δ0</i>                                            | "                             |
| <i>kap120 Δ</i> | a   | <i>kap120 Δ</i>        | <i>kap120 Δ::kanMX4 his3Δ1 leu2Δ0 met15Δ0 ura3Δ0</i>                                            | "                             |
| <i>kap122 Δ</i> | a   | <i>kap122 Δ</i>        | <i>kap122 Δ::kanMX4 his3Δ1 leu2Δ0 met15Δ0 ura3Δ0</i>                                            | "                             |
| <i>kap123 Δ</i> | a   | <i>kap123 Δ</i>        | <i>kap123 Δ::kanMX4 his3Δ1 leu2Δ0 met15Δ0 ura3Δ0</i>                                            | "                             |
| <i>kap142 /</i> |     |                        |                                                                                                 |                               |
| <i>msn5 Δ</i>   | a   | <i>kap142 / msn5 Δ</i> | <i>kap142 / msn5 Δ::kanMX4 his3Δ1 leu2Δ0 met15Δ0 ura3Δ0</i>                                     | "                             |
| <i>los1 Δ</i>   | a   | <i>los1 Δ</i>          | <i>los1 Δ::kanMX4 his3Δ1 leu2Δ0 met15Δ0 ura3Δ0</i>                                              | "                             |

\* All deletion strains were made in BY4741 background

TABLE S2A. Plasmids for expression in *E. coli*

| Plasmid  | Description                                                    | Marker | Protein Residues | Promoter | Source              |
|----------|----------------------------------------------------------------|--------|------------------|----------|---------------------|
| pGEX-2TK | <i>GST</i> vector                                              | AmpR   |                  | T7       | GE Healthcare       |
|          | <i>GST-NUP59*</i>                                              | "      | full-length      | "        | Allen et al., 2002  |
|          | <i>NUP159 GST-FG*</i>                                          | "      | 441-881          | "        | "                   |
| pSW487   | <i>GST-NUP42</i>                                               | "      | full-length      | "        | This work           |
| pSW1399  | <i>NSP1 GST-FxFG</i>                                           | "      | 167-601          | "        | "                   |
| pSW433   | <i>NUP100 GST-GLFG</i>                                         | "      | 2-610            | "        | Iovine et al., 1995 |
| pSW304   | <i>GST-NUP116 (codons 161-730)</i>                             | "      | 161-730          | "        | "                   |
| pNB3033  | <i>GAG3</i> -6xHIS-tag, optimized for <i>E.coli</i> expression | KanR   | 1-290            | "        | This work           |
| pNB3034  | CA-6xHIS-tag, optimized for <i>E.coli</i> expression           | "      | 1-207            | "        | "                   |
| pNB3028  | CA NTD-6xHIS-tag, optimized for <i>E.coli</i> expression       | "      | 1-135            | "        | "                   |
| pNB3029  | CA CTD-6xHIS-tag, optimized for <i>E.coli</i> expression       | "      | 136-207          | "        | "                   |
| pNB3030  | SP-NC-6xHIS-tag, optimized for <i>E.coli</i> expression        | "      | 208-290          | "        | "                   |
| pNB3031  | NC-6xHIS-tag, optimized for <i>E.coli</i> expression           | "      | 234-290          | "        | "                   |

TABLE S2B. Plasmids for expression in *S. cerevisiae*

| Plasmid     | Description                       | Copy #    | Ty3 Protein Residues | Promoter       | Source               |
|-------------|-----------------------------------|-----------|----------------------|----------------|----------------------|
| pSSL2010    | 2x-GFP in pYES2                   | 2 $\mu$   | N/A                  | p <i>GALI</i>  | Lin et al., 2001     |
| pNB2723     | <i>GAG3</i> -2xGFP                | "         | 1-290                | "              | This work            |
| pNB2725     | CA-2xGFP                          | "         | 1-207                | "              | "                    |
| pNB2726     | CA-SP-2xGFP                       | "         | 1-233                | "              | "                    |
| pNB2727     | CA NTD-2xGFP                      | "         | 1-135                | "              | "                    |
| pNB2728     | CA CTD-2x-GFP                     | "         | 136-207              | "              | "                    |
| pNB2729     | SP-NC-2xGFP                       | "         | 208-290              | "              | "                    |
| pNB2730     | NC-2xGFP                          | "         | 234-290              | "              | "                    |
| pNB2731     | NC(C267A)-2xGFP                   | "         | 234-290              | "              | "                    |
| pNB2361     | Ty3- <i>HIS3</i>                  | ARS4/CEN6 | full-length Ty3      | p <i>GALI0</i> | "                    |
| pDLC201     | wt Ty3                            | 2 $\mu$   | full-length Ty3      | "              | Hansen et al., 1988  |
| pDLC201     | mutant                            |           |                      |                | Larsen et al., 2007; |
| derivatives | Ty3 with mutations in <i>GAG3</i> | "         | full-length Ty3      | "              | Larsen et al., 2008  |

\*These plasmids are a gift from Dr. Rexach
